# Supplementary material for: Distribution and seasonal differences in Pacific Lamprey andLampetraspp eDNA across 18 Puget Sound watersheds
Source: PeerJ journal article supplement (doi:10.7717/peerj.4496), 2018-03-16

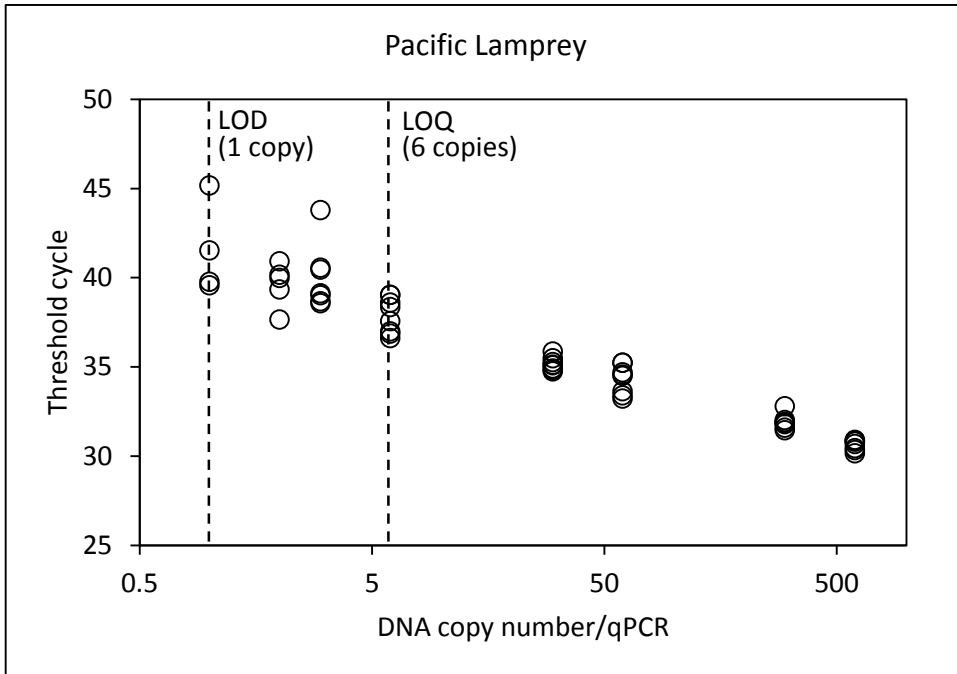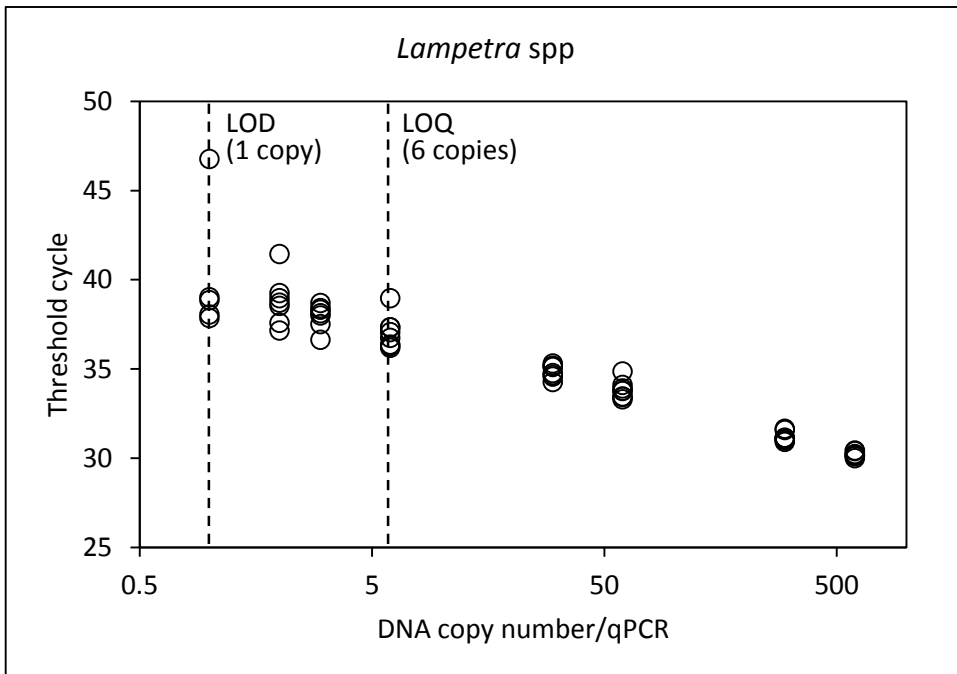

**Figure S1.** Limit of detection (LOD) and limit of quantification (LOQ) for the Pacific Lamprey (ETCytb\_890-1015) and *Lampetra* spp (LACytb\_890-1015) qPCR assays developed in this study. The limits were estimated by performing qPCR on a dilution series of each target oligonucleotide ultramer (1, 2, 3, 6, 30, 60, 300, and 600 copies/qPCR), with eight qPCR replicates per concentration. LOD is the minimum number of copies that could be detected and LOQ is the lowest number of copies that yielded positive amplification across the eight replicates.

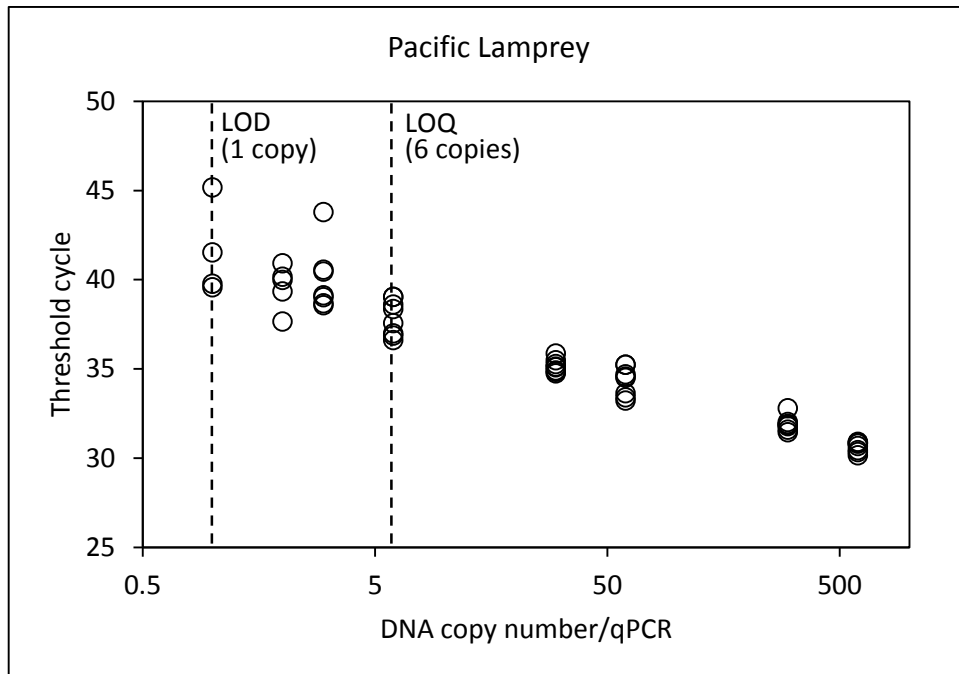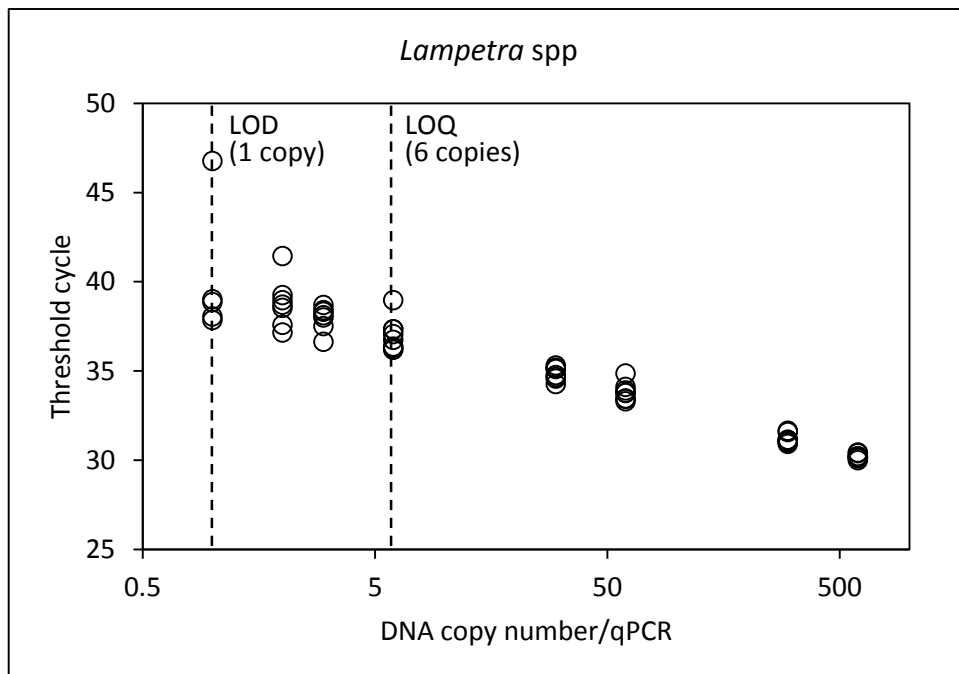

Supplement: Figure_S1.pdf [file Figure_S1.pdf]
