# Supplementary material for: Distribution and seasonal differences in Pacific Lamprey and Lampetra spp eDNA across 18 Puget Sound watersheds
Source: PeerJ. 2018 Mar 16;6:e4496. doi: 10.7717/peerj.4496 (PMC5858536; doi:10.7717/peerj.4496)
Supplement: Table S2 — Quantitative pPCR summary results for 91 Pacific Lamprey and 59 Lampetra spp distributed from Alaska to California and 37 fish species common to Puget Sound watersheds that were tested against the ETCytb_890-1015 and LACytb_890-1015 qPCR assays. Ct values are provided for samples that amplified a PCR product (X = no amplification). [file peerj-06-4496-s002.xlsx]

## Sheet: Sheet1
Species ID	Sample ID	Pacific lamprey qPCR assay mean Ct (ETCytb890-1,015)	Lampetra spp qPCR assay mean Ct (LACytb_890-1,015)	Sample provided by	Voucher # or GenBank accession #	Sample source
E. tridentatus	1379.1	22.6982	X	CRITFC	EtrNASSBC08-061408-064	Nass River, BC
E. tridentatus	1379.3	22.465	X	CRITFC	EtrNASSBC08-061408-073	Nass River, BC
E. tridentatus	1379.4	22.5341	X	CRITFC	EtrNASSBC08-061408-078	Nass River, BC
E. tridentatus	1379.5	24.9656	X	CRITFC	EtrNASSBC08-061408-079	Nass River, BC
E. tridentatus	1380.1	25.6246	X	CRITFC	EtrBCBC00-061900-001	Buck Creek, Bulkley River watershed, BC
E. tridentatus	1380.2	24.0586	X	CRITFC	EtrBCBC00-061900-003	Buck Creek, Bulkley River watershed, BC
E. tridentatus	1380.3	23.9836	X	CRITFC	EtrBCBC00-061900-004	Buck Creek, Bulkley River watershed, BC
E. tridentatus	1380.7	24.2953	X	CRITFC	EtrSTAMPBC11-001	Stamp River, BC
E. tridentatus	1380.8	23.694	X	CRITFC	EtrSTAMPBC11-002	Stamp River, BC
E. tridentatus	1380.9	24.201	X	CRITFC	EtrSTAMPBC11-003	Stamp River, BC
E. tridentatus	1380.1	24.3336	X	CRITFC	EtrSTAMPBC11-004	Stamp River, BC
E. tridentatus	2197.1	22.9735	X	CRITFC	EtrLGR14-022514-1129	Lower Granite Dam, Snake River, WA (identified through sibship reconstruction as originating from Middle Fork Salmon River, ID)
E. tridentatus	2197.2	26.7378	X	CRITFC	EtrLGR14-032514-1152	Lower Granite Dam, Snake River, WA (identified through sibship reconstruction as originating from Middle Fork Salmon River, ID)
E. tridentatus	2620	22.2661	X	CRITFC	EtrLGR14-120014-1230	Lower Granite Dam, Snake River, WA (identified through sibship reconstruction as originating from Middle Fork Clearwater River, ID)
E. tridentatus	2622.1	24.6586	X	CRITFC	EtrLGR14-042714-1427	Lower Granite Dam, Snake River, WA (identified through sibship reconstruction as originating from Middle Fork Clearwater River, ID)
E. tridentatus	2622.2	25.1072	X	CRITFC	EtrLGR15-022515-1415	Lower Granite Dam, Snake River, WA (identified through sibship reconstruction as originating from Middle Fork Clearwater River, ID)
E. tridentatus	2622.3	24.6429	X	CRITFC	EtrLGR15-022515-1416	Lower Granite Dam, Snake River, WA (identified through sibship reconstruction as originating from Middle Fork Clearwater River, ID)
E. tridentatus	2638.1	21.8835	X	CRITFC	EtrShitike14-001	Shitike Creek, OR
E. tridentatus	2638.2	22.0519	X	CRITFC	EtrShitike14-002	Shitike Creek, OR
E. tridentatus	2638.3	21.7204	X	CRITFC	EtrShitike14-003	Shitike Creek, OR
E. tridentatus	2638.4	21.5106	X	CRITFC	EtrWarmSprings14-001	Warm Springs River, OR
E. tridentatus	2638.5	21.6733	X	CRITFC	EtrWarmSprings14-002	Warm Springs River, OR
E. tridentatus	2638.6	21.5334	X	CRITFC	EtrWarmSprings14-003	Warm Springs River, OR
E. tridentatus	2742.1	26.1945	X	CRITFC	EtrLGR15-022515-1636	Lower Granite Dam, Snake River, WA (identified through sibship reconstruction as originating from Middle Fork Salmon River, ID)
E. tridentatus	2742.2	24.6553	X	CRITFC	EtrLGR15-022515-1615	Lower Granite Dam, Snake River, WA (identified through sibship reconstruction as originating from Middle Fork Clearwater River, ID)
E. tridentatus	2743.1	21.4668	X	CRITFC	EtrLGR15-022515-1705	Lower Granite Dam, Snake River, WA (identified through sibship reconstruction as originating from Middle Fork Salmon River, ID)
E. tridentatus	2745	24.662	X	CRITFC	EtrLGR14-120114-1934	Lower Granite Dam, Snake River, WA (identified through sibship reconstruction as originating from Middle Fork Clearwater River, ID)
E. tridentatus	2771	22.6985	X	CRITFC	EtrLGR15-052815-2030	Lower Granite Dam, Snake River, WA (identified through sibship reconstruction as originating from Middle Fork Salmon River, ID)
E. tridentatus	2773.1	24.81	X	CRITFC	EtrLGR14-032514-2236	Lower Granite Dam, Snake River, WA (identified through sibship reconstruction as originating from Middle Fork Salmon River, ID)
E. tridentatus	CR1	23.9407	X	USGS		Lower Columbia River, WA
E. tridentatus	CR10	24.8212	X	USGS		Lower Columbia River, WA
E. tridentatus	CR2	21.8557	X	USGS		Lower Columbia River, WA
E. tridentatus	CR3	23.5037	X	USGS		Lower Columbia River, WA
E. tridentatus	CR4	22.8904	X	USGS		Lower Columbia River, WA
E. tridentatus	CR5	22.0993	X	USGS		Lower Columbia River, WA
E. tridentatus	CR6	25.6617	X	USGS		Lower Columbia River, WA
E. tridentatus	CR7	23.1991	X	USGS		Lower Columbia River, WA
E. tridentatus	CR8	24.8232	X	USGS		Lower Columbia River, WA
E. tridentatus	CR9	24.7322	X	USGS		Lower Columbia River, WA
E. tridentatus	ENT 1	26.3911	X	USFWS		Entiat River, WA
E. tridentatus	ENT 2	23.2741	X	USFWS		Entiat River, WA
E. tridentatus	ENT 3	23.5781	X	USFWS		Entiat River, WA
E. tridentatus	ENT 4	23.9114	X	USFWS		Entiat River, WA
E. tridentatus	WEN 1	22.9803	X	USFWS		Wenatchee River, WA
E. tridentatus	WEN 2	24.682	X	USFWS		Wenatchee River, WA
E. tridentatus	WEN 3	25.5781	X	USFWS		Wenatchee River, WA
E. tridentatus	WEN 4	23.6706	X	USFWS		Wenatchee River, WA
E. tridentatus	WEN 5	21.9047	X	USFWS		Wenatchee River, WA
E. tridentatus	HSU5	22.9061	X	HSU	3909	Gualala R, CA
E. tridentatus	HSU6	22.3957	X	HSU	3974	Feather R (Sacramento R), CA
E. tridentatus	HSU7	22.0355	X	HSU	3915	Arroyo Seco, CA
E. tridentatus	HSU8	22.8892	X	HSU	3900	Pistol R, OR
E. tridentatus	PL1	25.0347	X	Yakama Nation		Either lower Columbia River or Yakima River, WA (larvae from both locations were reared in the same tank)
E. tridentatus	PL2	23.9023	X	Yakama Nation		Either lower Columbia River or Yakima River, WA (larvae from both locations were reared in the same tank)
E. tridentatus	PL3	24.2956	X	Yakama Nation		Either lower Columbia River or Yakima River, WA (larvae from both locations were reared in the same tank)
E. tridentatus	PL4	24.7641	X	Yakama Nation		Either lower Columbia River or Yakima River, WA (larvae from both locations were reared in the same tank)
E. tridentatus	PL6	23.9018	X	Yakama Nation		Wenatchee River, WA
E. tridentatus	PL7	22.6316	X	Yakama Nation		Wenatchee River, WA
E. tridentatus	PL8	24.4142	X	Yakama Nation		Wenatchee River, WA
E. tridentatus	PL9	26.6879	X	Yakama Nation		Wenatchee River, WA
E. tridentatus	PL10	23.0106	X	Yakama Nation		Wenatchee River, WA
E. tridentatus	PCLB1	21.5806	X	USFWS		Black River, WA
E. tridentatus	PCLB2	23.7263	X	USFWS		Black River, WA
E. tridentatus	PCLB3	22.115	X	USFWS		Black River, WA
E. tridentatus	PCLB4	23.1166	X	USFWS		Black River, WA
E. tridentatus	PCLN1	22.054	X	USFWS		Newaukum River, WA
E. tridentatus	PCLN2	21.0526	X	USFWS		Newaukum River, WA
E. tridentatus	PCLN3	21.0294	X	USFWS		Newaukum River, WA
E. tridentatus	PCLN4	20.6881	X	USFWS		Newaukum River, WA
E. tridentatus	PCLSK1	24.8599	X	USFWS		Skookumchuck River, WA
E. tridentatus	PCLSK2	24.0173	X	USFWS		Skookumchuck River, WA
E. tridentatus	PCLSK3	24.2062	X	USFWS		Skookumchuck River, WA
E. tridentatus	PCLSK4	25.0294	X	USFWS		Skookumchuck River, WA
E. tridentatus	PCLWI1	22.732	X	USFWS		Wind River, WA
E. tridentatus	PCLWi2	23.6497	X	USFWS		Wind River, WA
E. tridentatus	PCLWI3	23.54	X	USFWS		Wind River, WA
E. tridentatus	PCLWI4	22.7283	X	USFWS		Wind River, WA
E. tridentatus	ET 1	21.8155	X	USGS	KU672473	Duckabush River, Puget Sound, WA
E. tridentatus	ET 18	21.6629	X	USGS	KU672480	Green River, Puget Sound, WA
E. tridentatus	ET 35	23.7071	X	USGS	KU672485	Nisqually River, Puget Sound, WA
E. tridentatus	ET 38	21.6421	X	USGS	KU672484	Green River, Puget Sound, WA
E. tridentatus	ET10	27.2181	X	USGS	KU672476	Dungeness River, Puget Sound, WA
E. tridentatus	ET11	26.609	X	USGS	KU672477	Dungeness River, Puget Sound, WA
E. tridentatus	ET19	26.2626	X	USGS	KU672481	Green River, Puget Sound, WA
E. tridentatus	ET37	26.2667	X	USGS	KU672483	Green River, Puget Sound, WA
E. tridentatus	ET36	25.2059	X	USGS	KU672482	Green River, Puget Sound, WA
E. tridentatus	ET41	25.1133	X	USGS	KU672478	Dungeness River, Puget Sound, WA
E. tridentatus	ET42	25.6489	X	USGS	KU672479	Dungeness River, Puget Sound, WA
E. tridentatus	ET8	25.7321	X	USGS	KU672474	Dungeness River, Puget Sound, WA
E. tridentatus	ET9	26.9271	X	USGS	KU672475	Dungeness River, Puget Sound, WA
L. hubbsi	HSU3	X	21.0086	HSU	3969	Merced River (Sacramento R), CA
L. ayresii	HSU4	X	21.4997	HSU	DHG-140	Sacramento R Delta, CA
L. richardsoni	1381.1	X	24.451	CRITFC	LriFRAK03-061203-209-001	Farragut River, AK
L. richardsoni	1381.2	X	25.7666	CRITFC	LriFRAK03-061203-209-002	Farragut River, AK
L. richardsoni	1381.4	X	25.6579	CRITFC	LriFRAK03-061203-209-004	Farragut River, AK
L. richardsoni	1381.5	X	25.5346	CRITFC	LriSCBC-Smith-001	Smith Creek, BC
L. richardsoni	1381.6	X	22.218	CRITFC	LriSCBC-Smith-002	Smith Creek, BC
L. richardsoni	2199.1	X	22.5533	CRITFC	EtrKlick_YN14-0002	Klickitat River, WA
L. richardsoni	2199.2	X	20.1557	CRITFC	EtrSpeciesID_YN14-0002	Rock Creek, WA
L. richardsoni	2643.1	X	21.0358	CRITFC	EtrMosierCr14-0011	Mosier Creek, OR
L. richardsoni	2643.2	X	20.5629	CRITFC	EtrMosierCr14-0012	Mosier Creek, OR
L. richardsoni	2643.3	X	21.6384	CRITFC	EtrMosierCr14-0013	Mosier Creek, OR
L. richardsoni	2694.1	X	21.3691	CRITFC	EtrYNyak15-0218	Yakima River, WA
L. richardsoni	2694.2	X	20.4194	CRITFC	EtrYNyak15-0219	Yakima River, WA
L. richardsoni	2694.3	X	24.4084	CRITFC	EtrYNtop15-0124	Toppenish Creek, WA
L. richardsoni	2694.4	X	24.2908	CRITFC	EtrYNtop15-0125	Toppenish Creek, WA
L. richardsoni	2694.5	X	23.7688	CRITFC	EtrYNtop15-0126	Toppenish Creek, WA
L. richardsoni	2694.6	X	26.8	CRITFC	EtrYNtop15-0127	Toppenish Creek, WA
L. richardsoni	2694.7	X	24.644	CRITFC	EtrYNtop15-0128	Toppenish Creek, WA
L. richardsoni	2694.8	X	26.0833	CRITFC	EtrYNtop15-0129	Toppenish Creek, WA
L. richardsoni	2694.9	X	27.1777	CRITFC	EtrYNtop15-0130	Toppenish Creek, WA
L. richardsoni	HSU1	X	21.8915	HSU	3898	Euchre Ck, CA
L. richardsoni	HSU2	X	21.9768	HSU	3803	Prairie Ck (Redwood Cr), CA
L. richardsoni	YI	X	22.3641	Yakama Nation		Yakima River, WA
L. richardsoni	Y2	X	23.6178	Yakama Nation		Yakima River, WA
L. richardsoni	Y3	X	22.7685	Yakama Nation		Yakima River, WA
L. richardsoni	Y4	X	22.8282	Yakama Nation		Yakima River, WA
L. richardsoni	Y5	X	20.168	Yakama Nation		Yakima River, WA
L. richardsoni	WB-B1	X	21.2159	USFWS		Black River, WA
L. richardsoni	WB-B2	X	20.7004	USFWS		Black River, WA
L. richardsoni	WB-B3	X	21.3506	USFWS		Black River, WA
L. richardsoni	WB-B4	X	26.719	USFWS		Black River, WA
L. richardsoni	WB-SK1	X	21.5199	USFWS		Skookumchuck River, WA
L. richardsoni	WB-SK2	X	21.8629	USFWS		Skookumchuck River, WA
L. richardsoni	WB-SK3	X	22.4592	USFWS		Skookumchuck River, WA
L. richardsoni	WB-SK4	X	22.011	USFWS		Skookumchuck River, WA
Lampetra spp	L12	X	24.5422	USGS	KU672491	Nisqually River, Puget Sound, WA
Lampetra spp	L13	X	24.5461	USGS	KU672492	Nisqually River, Puget Sound, WA
Lampetra spp	L15	X	25.2411	USGS	KU672494	Nisqually River, Puget Sound, WA
Lampetra spp	L17	X	23.1938	USGS	KU672486	Green River, Puget Sound, WA
Lampetra spp	L2	X	22.6867	USGS	KU672487	Nisqually River, Puget Sound, WA
Lampetra spp	L20	X	22.3939	USGS	KU672503	Skagit River, Puget Sound, WA
Lampetra spp	L21	X	26.6169	USGS	KU672500	Puyallup River, Puget Sound, WA
Lampetra spp	L22	X	19.4346	USGS	KU672504	Skagit River, Puget Sound, WA
Lampetra spp	L23	X	26.0809	USGS		Skagit River, Puget Sound, WA
Lampetra spp	L24	X	25.4843	USGS	KU672506	Tahuya River, Puget Sound, WA
Lampetra spp	L25	X	25.7653	USGS	KU672507	Tahuya River, Puget Sound, WA
Lampetra spp	L26	X	24.6373	USGS	KU672508	Tahuya River, Puget Sound, WA
Lampetra spp	L29	X	25.8089	USGS	KU672495	Nisqually River, Puget Sound, WA
Lampetra spp	L3	X	25.0544	USGS	KU672488	Nisqually River, Puget Sound, WA
Lampetra spp	L30	X	26.9703	USGS	KU672505	Snoqualmie River, Puget Sound, WA
Lampetra spp	L31	X	24.1609	USGS	KU672499	Nooksack River, Puget Sound, WA
Lampetra spp	L32	X	24.0708	USGS	KU672496	Nisqually River, Puget Sound, WA
Lampetra spp	L4	X	23.0621	USGS	KU672489	Nisqually River, Puget Sound, WA
Gasterosterus aculeatus		X	X	UWBMFC	UW151198	WA
Thaleichthys pacificus		X	X	UWBMFC	UW155929	OR
Hypomesus pretiosus		X	X	UWBMFC	UW151202	AK
Richardsonius balteatus		X	X	UWBMFC	UW156044	WA
Spirinchus thaleichthys		X	X	UWBMFC	UW150987	WA
Novumbra hubbsi		X	X	UWBMFC	UW42434	WA
Rhinichthys cataractae		X	X	UWBMFC	UW152058	WA
Rhinichthys osculus		X	X	UWBMFC	UW152211	WA
Catostomus macrocheilus		X	X	UWBMFC	UW156064	WA
Ictalurus punctatus		X	X	UWBMFC	UW155796	WA
Cottus aleuticus		X	X	UWBMFC	UW152087	WA
Cottus asper		X	X	UWBMFC	UW152207	WA
Cottus rhotheus		X	X	UWBMFC	UW151941	WA
Cottus perplexus		X	X	UWBMFC	UW152061	WA
Oncorhynchus nerka		X	X	NPS		WA
Oncorhynchus tshawytscha		X	X	NPS		WA
Oncorhynchus kisutch		X	X	NPS		WA
Oncorhynchus gorbuscha		X	X	NPS		WA
Oncorhynchus keta		X	X	NPS		WA
Oncorhynchus clarkia		X	X	NPS		WA
Oncorhynchus mykiss		X	X	NPS		WA
Salvelinus fontinalis		X	X	NPS		WA
Salvelinus confluentus		X	X	NPS		WA
Pomoxis nigromaculatus		X	X	UW		WA
Mylocheilus caurinus		X	X	UW		WA
Spirinchus thaleichthys		X	X	UW		WA
Pomoxis nigromaculatus		X	X	UW		WA
Ptychocheilus oregonensis		X	X	UW		WA
Micropterus dolomieu		X	X	UW		WA
Perca flavescens		X	X	UW		WA
Ambloplites rupestris		X	X	UW		WA
Lepomis macrochirus		X	X	UW		WA
Ameiurus nebulosus		X	X	UW		WA
Catostomus macrocheilus		X	X	UW		WA
Micropterus salmoides		X	X	UW		WA
Tinca tinca		X	X	UW		WA
Lepomis gibbosus		X	X	UW		WA
Cyprinus carpio		X	X	UW		WA
Alosa sapidissima		X	X	USGS		OR
CRITFC, Columbia River Inter-Tribal Fish Commission
USGS, US Geological Survey
USFWS, US Fish and Wildlife Service
HSU, Humboldt State University
NPS, National Park Service
UWBMFC, University of Washington Burke Museum Fish Collection
UW, University of Washington
